# Supplementary material for: Quantifying Biomolecular Interactions Using Slow Mixing Mode (SLOMO) Nanoflow ESI-MS
Source: PubMed Central journal article supplement — ACS Cent Sci. 2022 Jul 6;8(7):963–74. doi: 10.1021/acscentsci.2c00215 (PMC9335916; doi:10.1021/acscentsci.2c00215), 2022-07-06
Supplement: oc2c00215_si_001.pdf [file oc2c00215_si_001.pdf]

**Supporting Information for:**

**Quantifying Biomolecular Interactions using Slow Mixing Mode (SLOMO)**

**Nanoflow ESI-MS**

Duong T. Bui,<sup>1</sup> Zhixiong Li,<sup>1</sup> Pavel I. Kitov,<sup>1</sup> Ling Han,<sup>1</sup> Elena N. Kitova,<sup>1</sup> Marlène Fortier,<sup>2</sup>  
Camille Fuselier,<sup>2</sup> Philippine Granger Joly de Boissel,<sup>2</sup> David Chatenet,<sup>2</sup> Nicolas Doucet,<sup>2</sup>  
Stephen M. Tompkins,<sup>3,4</sup> Yves St-Pierre,<sup>2</sup> Lara K. Mahal,<sup>1</sup> and John S. Klassen<sup>1\*</sup>

<sup>1</sup> *Department of Chemistry, University of Alberta, Edmonton, Alberta, Canada T6G 2G2*

<sup>2</sup> *Centre Armand-Frappier Santé Biotechnologie, Institut National de la Recherche Scientifique  
(INRS), Université du Québec, Laval, QC, Canada H7V 1B7*

<sup>3</sup> *Center for Vaccines and Immunology, University of Georgia, Athens, GA, USA*

<sup>4</sup> *Emory-UGA Centers of Excellence for Influenza Research and Surveillance (CEIRS), Athens, GA, USA*

\* Corresponding Author:

Department of Chemistry

University of Alberta

Edmonton, AB CANADA T6G 2G2

Email: john.klassen@ualberta.ca

Telephone: (780) 492-3501

Fax: (780) 492-8231

## Table of Contents

|                                                                                                                                                                                                                                                                                                                                                                                                                                  |      |
|----------------------------------------------------------------------------------------------------------------------------------------------------------------------------------------------------------------------------------------------------------------------------------------------------------------------------------------------------------------------------------------------------------------------------------|------|
| <b>Materials and Methods</b> .....                                                                                                                                                                                                                                                                                                                                                                                               | S4   |
| Production of human recombinant galectins and nanobody .....                                                                                                                                                                                                                                                                                                                                                                     | S4   |
| Quantification of LNT affinity for the sdAb-GAL-7 complex .....                                                                                                                                                                                                                                                                                                                                                                  | S4   |
| Solution mixing in nanoESI tip .....                                                                                                                                                                                                                                                                                                                                                                                             | S6   |
| Isothermal titration calorimetry (ITC) .....                                                                                                                                                                                                                                                                                                                                                                                     | S7   |
| <b>Tables</b> .....                                                                                                                                                                                                                                                                                                                                                                                                              | S8   |
| <b>Table S1.</b> Affinities and abundance ratios and relative response factors measured for the Van-AcAA interaction .....                                                                                                                                                                                                                                                                                                       | S8   |
| <b>Table S2.</b> Summary of molecular weights of RBD and the RBD-GAL-3C complexes measured by ESI-MS performed in positive ion mode. ....                                                                                                                                                                                                                                                                                        | S9   |
| <b>Figures</b> .....                                                                                                                                                                                                                                                                                                                                                                                                             | S12  |
| <b>Figure S1.</b> (a) Representative ESI mass spectrum acquired in positive ion mode for a solution of AcAA. (b) Time-resolved $R_{app}$ determined by SLOMO for a solution of Van and AcAA. ....                                                                                                                                                                                                                                | S12  |
| <b>Figure S2.</b> (a) Plot of time required to observe changes in $R_{app}$ for the Van-AcAA interaction measured by SLOMO versus incubation time on bench. (b) ITC measurement for Van and AcAA. ....                                                                                                                                                                                                                           | S12  |
| <b>Figure S3.</b> (a) Representative ESI mass spectra acquired in positive ion mode for PT and STI at different mixing times. (b) Plot of time-dependent $\Delta R_{app}$ . Inset shows $\Delta R_{app}$ values measured at early mixing times. (c) Plot of time-dependent relative response factors measured for PT and the (PT+STI) complex. (d) Fraction of bound PT plotted as a function of initial STI concentration. .... | S13  |
| <b>Figure S4.</b> (a) Representative ESI mass spectrum acquired in positive ion mode for a solution of GAL-7. (b) Fraction of GAL-7 present as dimer plotted as a function of initial monomer concentration. ....                                                                                                                                                                                                                | S14  |
| <b>Figure S5.</b> (a) Representative ESI mass spectra acquired in positive ion mode for a solution of GAL-7 and LNT. (b) Fraction of GAL-7 present as dimer plotted as a function of initial monomer concentration in the presence of LNT. ....                                                                                                                                                                                  | S14  |
| <b>Figure S6.</b> Representative ESI mass spectra acquired in positive ion mode for a solution of (a) sdAb and (b) sdAb and GAL-7 .....                                                                                                                                                                                                                                                                                          | S15  |
| <b>Figure S7.</b> (a) Representative time-resolved ESI mass spectra acquired in positive ion mode for a solution of GAL-7, sdAb and LNT. (b) Fraction of bound of sdAb plotted as a function initial GAL-7 monomer concentration .....                                                                                                                                                                                           | S15  |
| <b>Figure S8.</b> Representative ESI mass spectra acquired in positive ion mode for (a) GAL-1, (b) GAL-13 and (c) GAL-3 .....                                                                                                                                                                                                                                                                                                    | S16  |
| <b>Figure S9.</b> Representative ESI mass spectra acquired in positive ion mode for sdAb with (a) GAL-1, (b) GAL-13 and (c) GAL-3 .....                                                                                                                                                                                                                                                                                          | S167 |
| <b>Figure S10.</b> Representative ESI mass spectra acquired in positive ion mode for solutions of (a) hGAL-3C, (b) RBD and (c) RBD and GAL-3C. Expanded regions of ESI mass spectrum (in c), corresponding to free RBD and (RBD+GAL-3C) complex at the +10 and +13 charge states .....                                                                                                                                           | S18  |

|                                                                                                                                                                    |     |
|--------------------------------------------------------------------------------------------------------------------------------------------------------------------|-----|
| <b>Figure S11.</b> Representative ESI mass spectra acquired in positive ion mode for solutions of (a) GAL-1 and RBD, (b) GAL-7 and RBD and (c) GAL-13 and RBD..... | S19 |
| <b>Figure S12.</b> Representative ESI mass spectra acquired in positive ion mode for solutions of (a) CBM, (b) B-triNGL-NDs and (c-d) CBM and B-triNGL-NDs.....    | S20 |
| <b>References</b> .....                                                                                                                                            | S21 |

## Materials and Methods

### Production of recombinant human galectins and nanobody.

Recombinant human galectins were purified as previously described<sup>S1</sup> using pET-22b(+) vectors encoding the respective cDNA for human galectin-1,-3, -7 and -13. The recombinant proteins were produced in *E.coli* BL21 (DE3) cells and purified by affinity chromatography using lactose (or mannose in the case of GAL-13) using standard protocols.<sup>S2</sup> Production and purification of the GAL-7-specific nanobody (sdAB) was also carried out in *E. coli* cells using the basic pHEN2 vector followed by standard metal (Ni)-affinity chromatography (His GraviTrap, Sigma-Aldrich, Oakville, Canada).

### Quantification of binding affinity of sdAb-GAL-7 complex to LNT

Quantification of sdAB-GAL-7 binding in the presence of LNT and GAL-7 binding to LNT was performed simultaneously using SLOMO. 2-3  $\mu\text{L}$  of ammonium acetate (200 mM, pH 7.4) solution of sdAb (3  $\mu\text{M}$ ), GAL-7 (2-6  $\mu\text{M}$ ) and LNT (50  $\mu\text{M}$ ) was loaded followed by 10  $\mu\text{L}$  of solution of sdAb (3  $\mu\text{M}$ ), GAL-7 (40  $\mu\text{M}$ ) and LNT (50  $\mu\text{M}$ ). In the sdAb-GAL-7-LNT mixture, LNT binds to GAL-7 monomer, GAL-7 dimer and sdAb-GAL-7 complex. When GAL-7 monomer and dimer are treated as one species and the binding sites are counted ( $P_1$ ), there are two type of complexes with LNT: GAL-7-LNT ( $P_1L$ ) and sdAb-GAL-7-LNT ( $P_1P_2L$ ). The following equilibria exist in the solution (eqs S1-3):

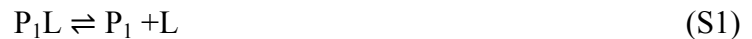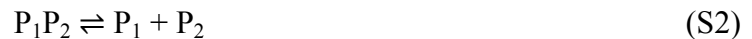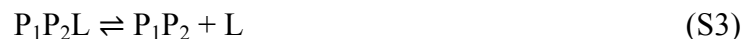

The dissociation constant ( $K_d$ ) for each equilibrium can be calculated using eqs S4-6:

$$K_{d,1} = \frac{[P_1][L]}{[P_1L]} \quad (S4)$$

$$K_{d,2} = \frac{[P_1][P_2]}{[P_1P_2]} \quad (S5)$$

$$K_{d,3} = \frac{[P_1P_2][L]}{[P_1P_2L]} \quad (S6)$$

The mass balance for the species in the solution can be expressed by eqs S7-9:

$$[L]_0 = [L] + [P_1L] + [P_1P_2L] \quad (S7)$$

$$[P_1]_0 = [P_1] + [P_1L] + [P_1P_2] + [P_1P_2L] \quad (S8)$$

$$[P_2]_0 = [P_2] + [P_1P_2] + [P_1P_2L] \quad (S9)$$

From eq S9, each concentration can be expressed in term of sum of corresponding ion abundances (*Ab*), eqs S10-12:

$$[P_2] = \frac{Ab(P_2)[P_2]_0}{Ab(P_2) + RF_{P_2/P_1P_2} Ab(P_1P_2) + RF_{P_2/P_1P_2} Ab(P_1P_2L)} \quad (S10)$$

$$[P_1P_2] = \frac{RF_{P_2/P_1P_2} Ab(P_1P_2)[P_2]_0}{Ab(P_2) + RF_{P_2/P_1P_2} Ab(P_1P_2) + RF_{P_2/P_1P_2} Ab(P_1P_2L)} \quad (S11)$$

$$[P_1P_2L] = \frac{RF_{P_2/P_1P_2} Ab(P_1P_2L)[P_2]_0}{Ab(P_2) + RF_{P_2/P_1P_2} Ab(P_1P_2) + RF_{P_2/P_1P_2} Ab(P_1P_2L)} \quad (S12)$$

where  $RF_{P_2/P_1P_2}$  is the relative response factor of sdAb ( $P_2$ ) over sdAb-GAL-7 ( $P_1P_2$ ) calculated using SLOMO. The value of  $[P_1]$  is then calculated using eq S13:

$$[P_1] = \frac{K_{d,2}[P_1P_2]}{[P_2]} \quad (S13)$$

and  $[P_1L]$  calculated using eq S14:

$$[P_1L] = [P_1]_0 - \frac{K_{d,2}[P_1P_2]}{[P_2]} - [P_1P_2] - [P_1P_2L] \quad (S14)$$

and  $[L]$  using eqs S15a-b:

$$[L] = [L]_0 - [P_1L] - [P_1P_2L] = [L]_0 - [P_1]_0 + \frac{K_{d,2}[P_1P_2]}{[P_2]} + [P_1P_2] \quad (S15a)$$

$$[L] = [L]_0 - [P_1]_0 + \frac{K_{d,2}RF_{P_2/P_1P_2}Ab(P_1P_2)}{Ab(P_2)} + \frac{RF_{P_2/P_1P_2}Ab(P_1P_2)[P_2]_0}{Ab(P_2) + RF_{P_2/P_1P_2}Ab(P_1P_2) + RF_{P_2/P_1P_2}Ab(P_1P_2L)} \quad (S15b)$$

$K_{d,3}$  is then obtained using eqs S16a-b:

$$K_{d,3} = \frac{Ab(P_1P_2)[L]}{Ab(P_1P_2L)} \quad (S16a)$$

$$K_{d,3} = \frac{Ab(P_1P_2)}{Ab(P_1P_2L)} \left( [L]_0 - [P_1]_0 + \frac{K_{d,2}RF_{P_2/P_1P_2}(Ab(P_1P_2))}{Ab(P_2)} + \frac{RF_{P_2/P_1P_2}Ab(P_1P_2)[P_2]_0}{Ab(P_2) + RF_{P_2/P_1P_2}Ab(P_1P_2) + RF_{P_2/P_1P_2}Ab(P_1P_2L)} \right) \quad (S16b)$$

### Solution mixing in nanoESI tip

To establish the relative contribution of diffusion and electroosmotic and electrophoretic flow to analyte mixing, we performed a series of control experiments. First, we measured the solution flow rate achieved with the nanoESI tips by measuring the distance traveled by the meniscus of the solution in the tip. According to these measurements, the average solution flow rate is  $14 \pm 4$  nL min<sup>-1</sup>, which is consistent with flow rates reported previously for comparable nanoESI tips. Solvent losses resulting from evaporation were taken into account. Based on the average flow rate and assuming there is no mixing of the solutions, it will take approximately 3.5 h for the *Solution I* volume to be consumed, which is significantly longer than the times required to observe changes in  $R_{app}$ . Next, we assessed the influence of electroosmotic and electrophoretic flow on mixing of the analyte. A series of nanoESI tips were loaded with 3  $\mu$ L of a solution of Van (2  $\mu$ M) and AcAA (10  $\mu$ M), followed by injection of 10  $\mu$ L of a solution of Van (2  $\mu$ M) and AcAA (500  $\mu$ M). The

solutions were incubated on the bench for varying times before performing time-resolved ESI-MS analysis. Notably, the time required to observe significant changes in  $R_{app}$  is similar to those measured by continuous ESI-MS analysis (Figure S2). Together, these results suggest that analyte mixing inside the nanoESI tips is dominated by diffusion.

### **Isothermal titration calorimetry (ITC)**

The ITC measurements (of the Van-AcAA complex affinity) were carried out using a Microcal PEAQ ITC (Malvern Panalytical, Worcestershire, United Kingdom). For each experiment, a Van solution (100  $\mu\text{M}$ ) in the sample cell was titrated with a solution of AcAA (1.0 mM); both the Van and AcAA were in aqueous ammonium acetate solutions (200 mM, pH 6.9, 25  $^{\circ}\text{C}$ ). The experimental parameters used are: 0.4  $\mu\text{L}$  for the first injection, 2  $\mu\text{L}$ /injection for 2-19 injections, reference power 5  $\mu\text{W}$ , duration 0.8 s for the first injection, 4.0 s for the rest, injection interval (spacing) 150 s.

## Tables

**Table S1.** Affinities ( $K_d$ ) and other parameters (incubation time required to observe solution mixing,  $R_{app}$ ,  $RF_{Van/VanAcAA}$ ,  $R$  and  $K_{d,app}$ ) calculated from SLOMO performed on ammonium acetate (200 mM, pH 6.9, 25 °C) solutions of Van (2  $\mu$ M) and AcAA (5  $\mu$ M – 40  $\mu$ M).

| [AcAA] <sub>0</sub><br>( $\mu$ M) | Incubation<br>time (min) | $R_{app}$            | $RF_{Van/VanAcAA}$ | $R$  | $K_{d,app}$<br>( $\mu$ M) | $K_d$<br>( $\mu$ M) |
|-----------------------------------|--------------------------|----------------------|--------------------|------|---------------------------|---------------------|
| 5                                 | 21                       | $1.4 \times 10^{-2}$ | 11.1               | 0.15 | 355.2                     | 31.6                |
| 5                                 | 22                       | $1.1 \times 10^{-2}$ | 11.8               | 0.14 | 452.6                     | 34.0                |
| 5                                 | 40                       | $1.1 \times 10^{-2}$ | 10.7               | 0.12 | 452.6                     | 39.9                |
| 10                                | 11                       | $2.5 \times 10^{-2}$ | 8.3                | 0.21 | 398.0                     | 46.0                |
| 10                                | 15                       | $5.5 \times 10^{-2}$ | 6.5                | 0.36 | 179.9                     | 26.3                |
| 10                                | 5                        | $5.5 \times 10^{-2}$ | 4.2                | 0.23 | 179.9                     | 41.9                |
| 20                                | 20                       | $5.3 \times 10^{-2}$ | 13.8               | 0.72 | 375.5                     | 26.6                |
| 20                                | 35                       | $7.0 \times 10^{-2}$ | 9.5                | 0.66 | 283.9                     | 29.1                |
| 20                                | 20                       | $8.6 \times 10^{-2}$ | 7.8                | 0.67 | 230.7                     | 28.7                |
| 30                                | 18                       | $7.1 \times 10^{-2}$ | 13.9               | 0.99 | 420.7                     | 29.3                |
| 30                                | 35                       | $6.4 \times 10^{-2}$ | 14.6               | 0.94 | 466.9                     | 30.9                |
| 30                                | 35                       | 0.11                 | 6.7                | 0.76 | 270.9                     | 38.3                |
| 40                                | 30                       | $8.5 \times 10^{-2}$ | 15.2               | 1.3  | 468.7                     | 29.9                |
| 40                                | 35                       | 0.12                 | 8.8                | 1.1  | 331.6                     | 35.4                |
| 40                                | 30                       | 0.11                 | 9.6                | 1.1  | 361.8                     | 35.4                |



**Table S2.** Summary of the molecular weights (MWs) of the glycoforms ( $P_i$ ) of RBD and RBD+GAL-3C complex measured by ESI-MS performed in positive ion mode on ammonium acetate solutions (200 mM, pH 7.4) of RBD (5  $\mu$ M) and GAL-3C (5  $\mu$ M). The average MWs of free RBD glycoforms were calculated from the  $m/z$  values of three charge states; the MWs of the (RBD+GAL-3C) complexes were calculated from  $m/z$  measured at two charge states.

| $P_i$ | Detected mass-to-charge ratio<br>( $m/z$ ) |          |         | Free RBD<br>MW (Da) <sup>a</sup> | RBD-GAL-3C<br>Complex<br>MW (Da) | RBD-GAL-3C<br>Complex<br>Theoretical<br>MW (Da) |
|-------|--------------------------------------------|----------|---------|----------------------------------|----------------------------------|-------------------------------------------------|
|       | $z = 11$                                   | $z = 10$ | $z = 9$ |                                  |                                  |                                                 |
| P1    | 2821.1                                     | 3103.3   | 3448.2  | 31023 $\pm$ 2                    | ND                               | 47349                                           |
| P2    | 2829.0                                     | 3111.8   | 3457.6  | 31108 $\pm$ 1                    | ND                               | 47435                                           |
| P3    | 2835.8                                     | 3119.3   | 3465.8  | 31183 $\pm$ 1                    | 47508                            | 47510                                           |
| P4    | 2838.4                                     | 3122.3   | 3469.3  | 31213 $\pm$ 2                    | 47540                            | 47540                                           |
| P5    | 2842.2                                     | 3126.4   | 3473.4  | 31253 $\pm$ 1                    | 47578                            | 47580                                           |
| P6    | 2845.5                                     | 3130.0   | 3477.8  | 31290 $\pm$ 1                    | ND                               | 47617                                           |
| P7    | 2851.9                                     | 3137.1   | 3485.2  | 31360 $\pm$ 2                    | 47683                            | 47686                                           |
| P8    | 2855.5                                     | 3141.1   | 3490.3  | 31401 $\pm$ 2                    | 47730                            | 47728                                           |
| P9    | 2858.7                                     | 3144.5   | 3494.1  | 31435 $\pm$ 2                    | 47759                            | 47763                                           |
| P10   | 2862.2                                     | 3148.3   | 3498.3  | 31474 $\pm$ 1                    | 47800                            | 47801                                           |
| P11   | 2865.1                                     | 3151.6   | 3500.9  | 31503 $\pm$ 4                    | 47829                            | 47830                                           |
| P12   | 2868.8                                     | 3155.6   | 3505.8  | 31545 $\pm$ 1                    | 47870                            | 47871                                           |
| P13   | 2871.8                                     | 3158.9   | 3510.0  | 31580 $\pm$ 1                    | 47906                            | 47906                                           |
| P14   | 2875.4                                     | 3162.9   | 3514.4  | 31619 $\pm$ 1                    | 47943                            | 47946                                           |
| P15   | 2877.2                                     | 3164.9   | 3516.6  | 31639 $\pm$ 1                    | ND                               | 47966                                           |
| P16   | 2882.1                                     | 3170.3   | 3521.7  | 31691 $\pm$ 4                    | 48018                            | 48017                                           |
| P17   | 2885.0                                     | 3173.5   | 3526.3  | 31726 $\pm$ 2                    | 48050                            | 48052                                           |
| P18   | 2888.6                                     | 3177.4   | 3530.3  | 31764 $\pm$ 1                    | 48092                            | 48091                                           |
| P19   | 2890.5                                     | 3179.4   | 3532.4  | 31784 $\pm$ 1                    | ND                               | 48110                                           |
| P20   | 2891.7                                     | 3180.9   | 3534.3  | 31799 $\pm$ 1                    | ND                               | 48125                                           |
| P21   | 2894.4                                     | 3183.9   | 3537.5  | 31828 $\pm$ 1                    | 48157                            | 48155                                           |
| P22   | 2898.3                                     | 3188.0   | 3542.2  | 31870 $\pm$ 1                    | 48196                            | 48197                                           |
| P23   | 2901.9                                     | 3192.0   | 3546.6  | 31910 $\pm$ 1                    | ND                               | 48237                                           |
| P24   | 2903.6                                     | 3193.9   | 3548.6  | 31929 $\pm$ 1                    | ND                               | 48256                                           |
| P25   | 2905.1                                     | 3195.6   | 3550.6  | 31946 $\pm$ 1                    | ND                               | 48272                                           |

|     |        |        |        |           |       |       |
|-----|--------|--------|--------|-----------|-------|-------|
| P26 | 2908.6 | 3199.4 | 3555.1 | 31985 ± 2 | 48310 | 48311 |
| P27 | 2911.6 | 3202.7 | 3558.4 | 32017 ± 1 | 48342 | 48343 |
| P28 | 2915.3 | 3206.6 | 3563.1 | 32057 ± 1 | ND    | 48384 |
| P29 | 2918.4 | 3210.1 | 3566.8 | 32091 ± 1 | ND    | 48418 |
| P30 | 2924.8 | 3217.2 | 3574.3 | 32161 ± 1 | 48487 | 48488 |
| P31 | 2928.3 | 3221.2 | 3578.6 | 32200 ± 2 | ND    | 48527 |
| P32 | 2931.5 | 3224.6 | 3582.7 | 32236 ± 1 | 48558 | 48562 |
| P33 | 2935.0 | 3228.5 | 3587.0 | 32274 ± 1 | ND    | 48601 |
| P34 | 2936.8 | 3230.5 | 3589.4 | 32295 ± 1 | ND    | 48622 |
| P35 | 2938.3 | 3232.0 | 3591.0 | 32310 ± 1 | ND    | 48637 |
| P36 | 2941.9 | 3236.0 | 3595.2 | 32349 ± 2 | ND    | 48676 |
| P37 | 2944.8 | 3239.2 | 3599.1 | 32382 ± 1 | 48706 | 48709 |
| P38 | 2948.1 | 3243.0 | 3602.9 | 32418 ± 1 | ND    | 48745 |
| P39 | 2950.1 | 3245.1 | 3605.4 | 32440 ± 1 | ND    | 48767 |
| P40 | 2951.3 | 3246.5 | 3607.1 | 32454 ± 1 | 48778 | 48781 |
| P41 | 2955.1 | 3250.4 | 3611.4 | 32494 ± 1 | ND    | 48821 |
| P42 | 2958.0 | 3253.7 | 3615.1 | 32527 ± 1 | 48854 | 48854 |
| P43 | 2961.4 | 3257.5 | 3619.0 | 32564 ± 1 | ND    | 48891 |
| P44 | 2963.3 | 3259.6 | 3621.6 | 32586 ± 1 | ND    | 48913 |
| P45 | 2964.7 | 3261.2 | 3623.0 | 32600 ± 2 | 48922 | 48927 |
| P46 | 2971.3 | 3268.3 | 3631.2 | 32673 ± 1 | 48995 | 48999 |
| P47 | 2978.0 | 3275.6 | 3639.1 | 32745 ± 2 | 49067 | 49072 |
| P48 | 2981.7 | 3279.5 | 3644.2 | 32787 ± 2 | ND    | 49114 |
| P49 | 2984.3 | 3282.8 | 3647.0 | 32816 ± 2 | 49146 | 49143 |
| P50 | 2987.7 | 3286.3 | 3651.3 | 32853 ± 1 | ND    | 49180 |
| P51 | 2991.2 | 3290.3 | 3655.5 | 32892 ± 1 | 49216 | 49218 |
| P52 | 2994.8 | 3294.2 | 3660.1 | 32932 ± 1 | 49253 | 49258 |
| P53 | 2996.5 | 3296.2 | 3662.3 | 32951 ± 1 | ND    | 49278 |
| P54 | 3004.4 | 3304.8 | 3671.8 | 33037 ± 1 | 49362 | 49364 |
| P55 | 3007.6 | 3308.6 | 3675.9 | 33074 ± 2 | ND    | 49401 |
| P56 | 3017.6 | 3319.4 | 3688.0 | 33183 ± 1 | 49511 | 49510 |
| P57 | 3021.1 | 3323.0 | 3692.1 | 33221 ± 1 | ND    | 49547 |
| P58 | 3023.0 | 3325.2 | 3694.5 | 33242 ± 1 | ND    | 49569 |
| P59 | 3024.4 | 3326.7 | 3696.3 | 33257 ± 1 | 49579 | 49584 |
| P60 | 3031.1 | 3333.9 | 3703.9 | 33328 ± 2 | 49650 | 49655 |
| P61 | 3037.6 | 3341.0 | 3712.1 | 33401 ± 1 | ND    | 49728 |
| P62 | 3044.0 | 3348.4 | 3720.4 | 33474 ± 1 | 49802 | 49800 |

|     |        |        |        |           |       |       |
|-----|--------|--------|--------|-----------|-------|-------|
| P63 | 3049.5 | 3354.4 | 3726.8 | 33533 ± 1 | ND    | 49860 |
| P64 | 3051.3 | 3356.0 | 3728.4 | 33550 ± 3 | ND    | 49877 |
| P65 | 3056.3 | 3361.9 | 3735.3 | 33609 ± 1 | 49937 | 49935 |
| P66 | 3064.1 | 3370.4 | 3744.8 | 33694 ± 1 | 50020 | 50021 |
| P67 | 3074.4 | 3381.7 | 3756.8 | 33805 ± 3 | ND    | 50132 |
| P68 | 3082.7 | 3390.9 | 3767.6 | 33899 ± 1 | ND    | 50226 |

<sup>a</sup>. Errors correspond to one standard deviation.

## Figures

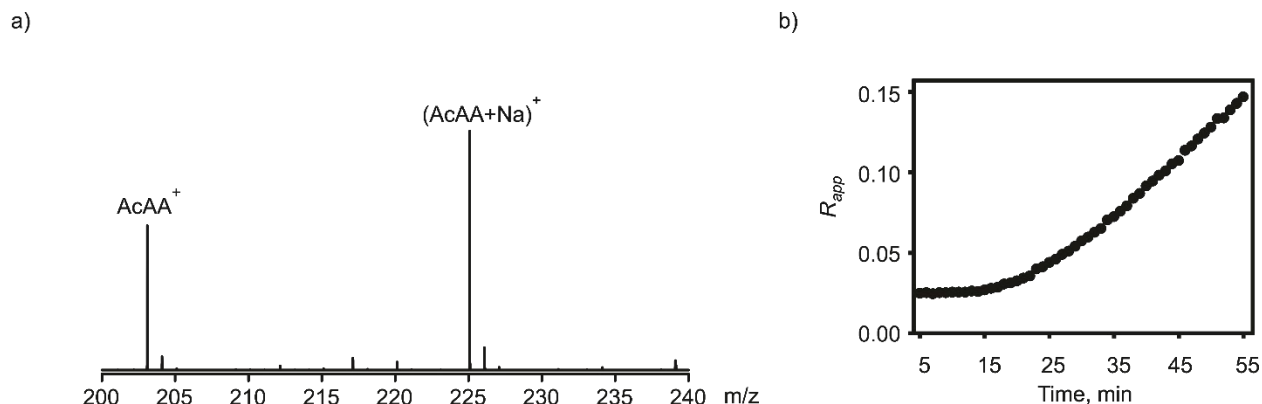

**Figure S1.** (a) Representative ESI mass spectrum acquired in positive ion mode for a 200 mM ammonium acetate solution (pH 6.9, 25 °C) of AcAA (20  $\mu$ M). (b) Time-dependent abundance ratios of the bound (to AcAA) to free Van ( $R_{app}$ ) measured by SLOMO using 3  $\mu$ L of *Solution 1* (Van-AcAAVan (2  $\mu$ M) and AcAA (10  $\mu$ M)) and 7  $\mu$ L of *Solution 2* (Van (2  $\mu$ M) and AcAA (500  $\mu$ M)).

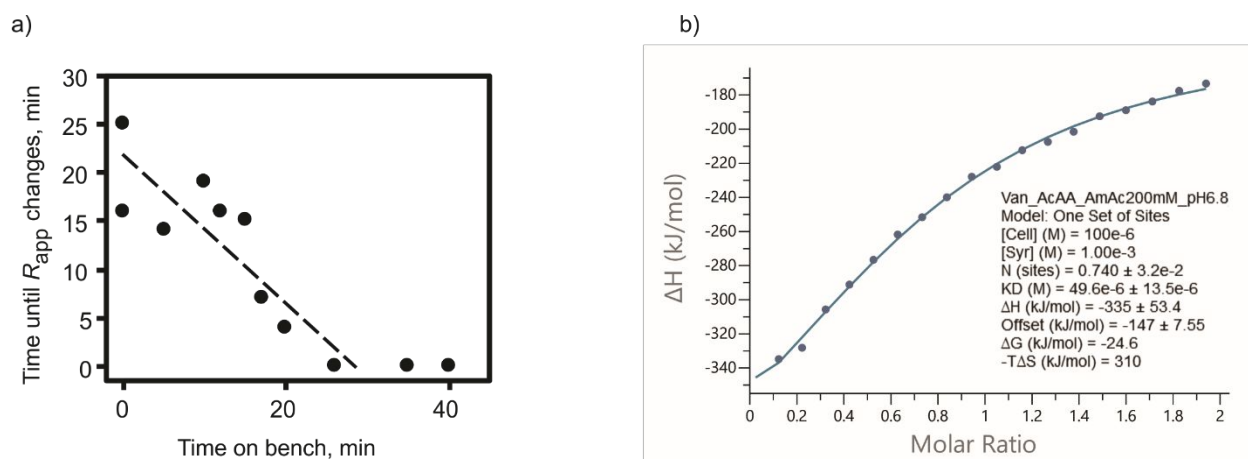

**Figure S2.** (a) Plot of time required to observe changes in  $R_{app}$  measured by SLOMO versus incubation time on bench. Measurements performed using 3  $\mu$ L of *Solution 1* (Van-AcAAVan (2  $\mu$ M) and AcAA (10  $\mu$ M)) and 7  $\mu$ L of *Solution 2* (Van (2  $\mu$ M) and AcAA (500  $\mu$ M)); both solutions were 200 mM ammonium acetate (pH 6.9, 25 °C). (b) ITC data measured for the binding of Van (100  $\mu$ M) and AcAA (1 mM) in aqueous ammonium acetate (200 mM, pH 6.9, 25 °C).

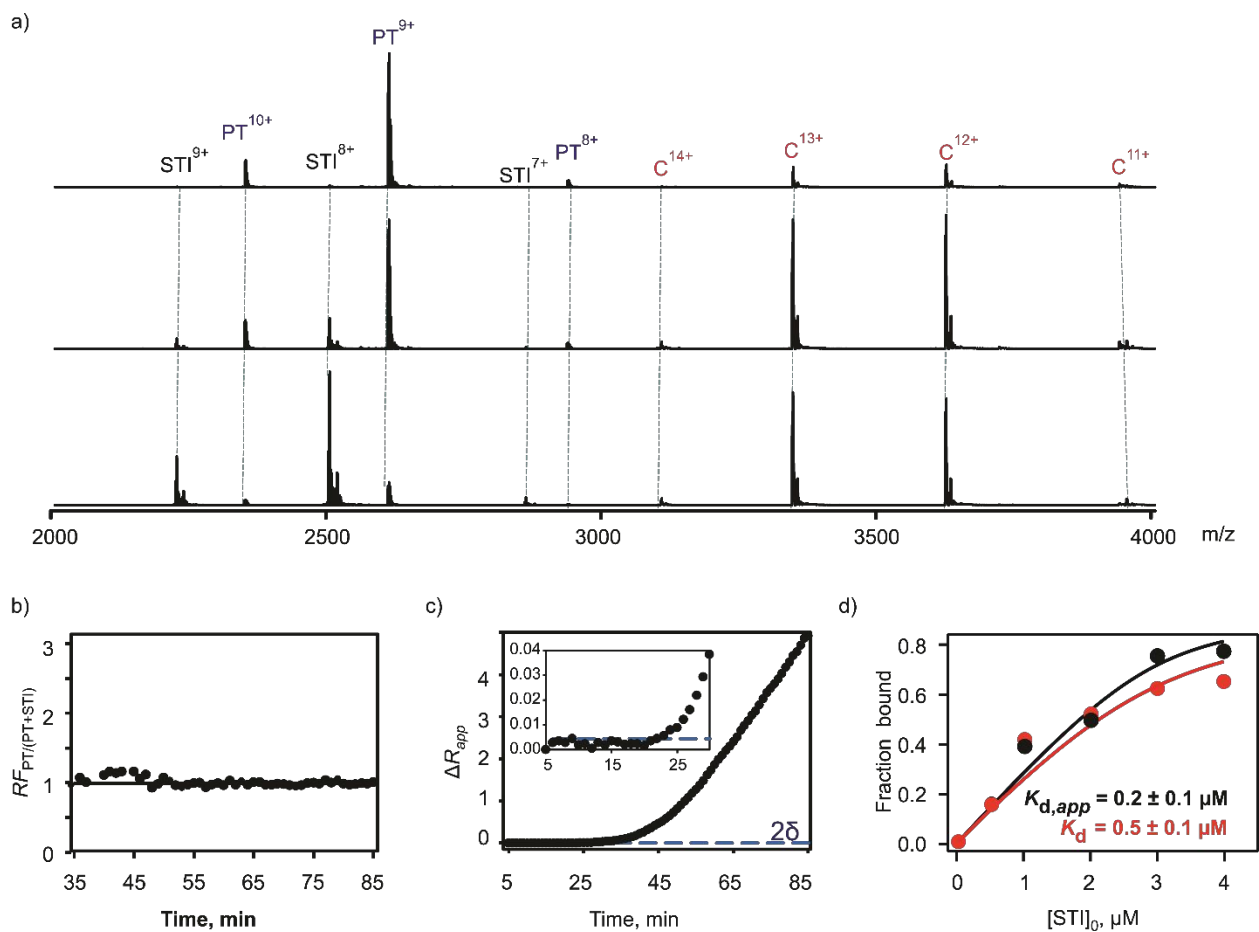

**Figure S3.** (a) Representative ESI mass spectra acquired in positive ion mode for an ammonium acetate solution (200 mM, pH 4.5) of PT (3  $\mu M$ ) and STI (0.5  $\mu M$ ) at different mixing times. (b) Plot of time-dependent  $\Delta R_{app}$ . Inset shows  $\Delta R_{app}$  values measured at early mixing times (c) Plot of time-dependent relative response factors ( $RF_{PT/(PT+STI)}$ ) measured for PT and the (PT+STI) complex (d) Fraction of bound PT plotted as a function of initial STI concentration determined without (black circles) and with (red circles) consideration of  $RF_{PT/C}$ . Solid curves represent best fit of eq 11 to the experimental data.

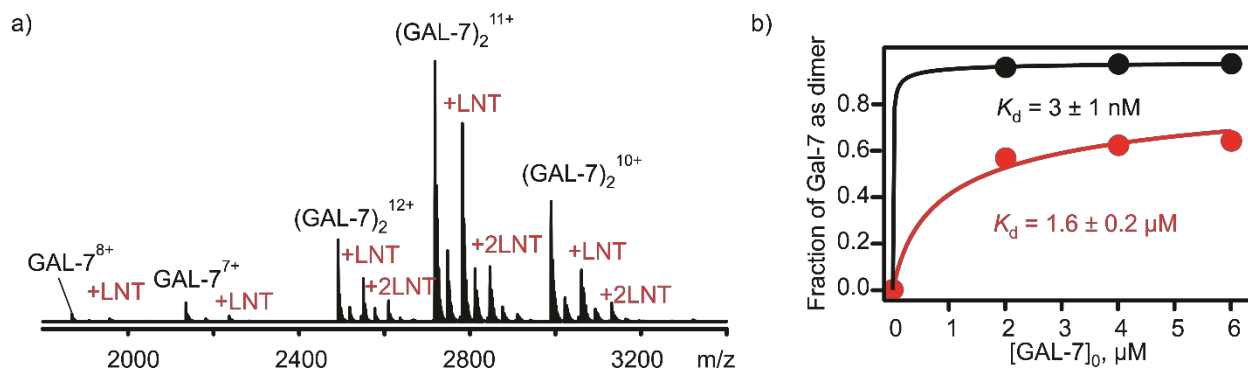

**Figure S4.** (a) Representative ESI mass spectrum acquired in positive ion mode for a 200 mM ammonium acetate solution (pH 7.4, 25 °C) of GAL-7 (4  $\mu\text{M}$ ). (b) Fraction of GAL-7 present as dimer plotted as a function of initial monomer concentration ( $[\text{GAL-7}]_0$ ) determined without (black circles) and with (red circles) consideration of  $RF_{\text{GAL-7}/(\text{GAL-7})_2}$ . Solid curves represent best fit of eq 11 to the experimental data.

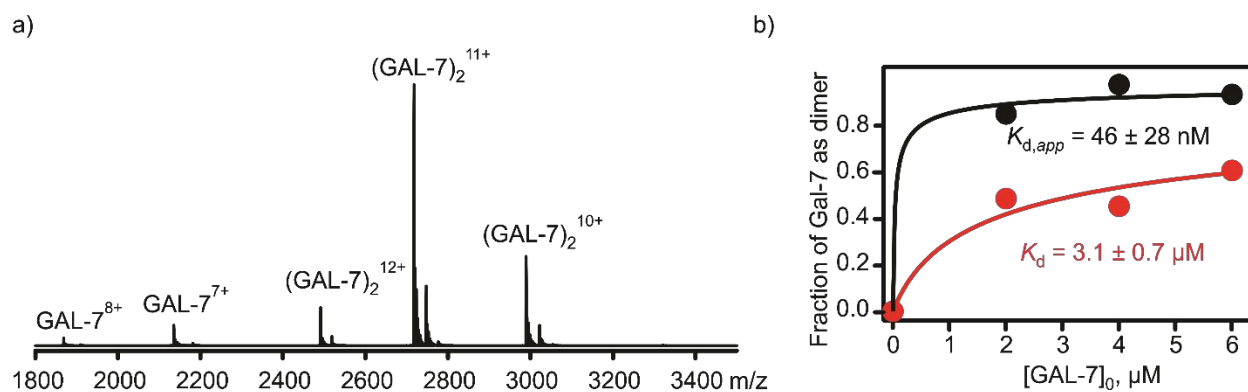

**Figure S5.** (a) Representative ESI mass spectra acquired in positive ion mode for a 200 mM ammonium acetate solution (pH 7.4, 25 °C) of GAL-7 (2  $\mu\text{M}$ ) and LNT (50  $\mu\text{M}$ ). (b) Fraction of GAL-7 present as dimer plotted as a function of initial monomer concentration ( $[\text{GAL-7}]_0$ ) in the presence of LNT (50  $\mu\text{M}$ ) determined without (black circles) and with (red circles) consideration of  $RF_{\text{GAL-7}/(\text{GAL-7})_2}$ . Solid curves represent best fit of eq 11 to the experimental data acquired in positive ion mode for 200 mM ammonium acetate solution (pH 7.4, 25 °C).

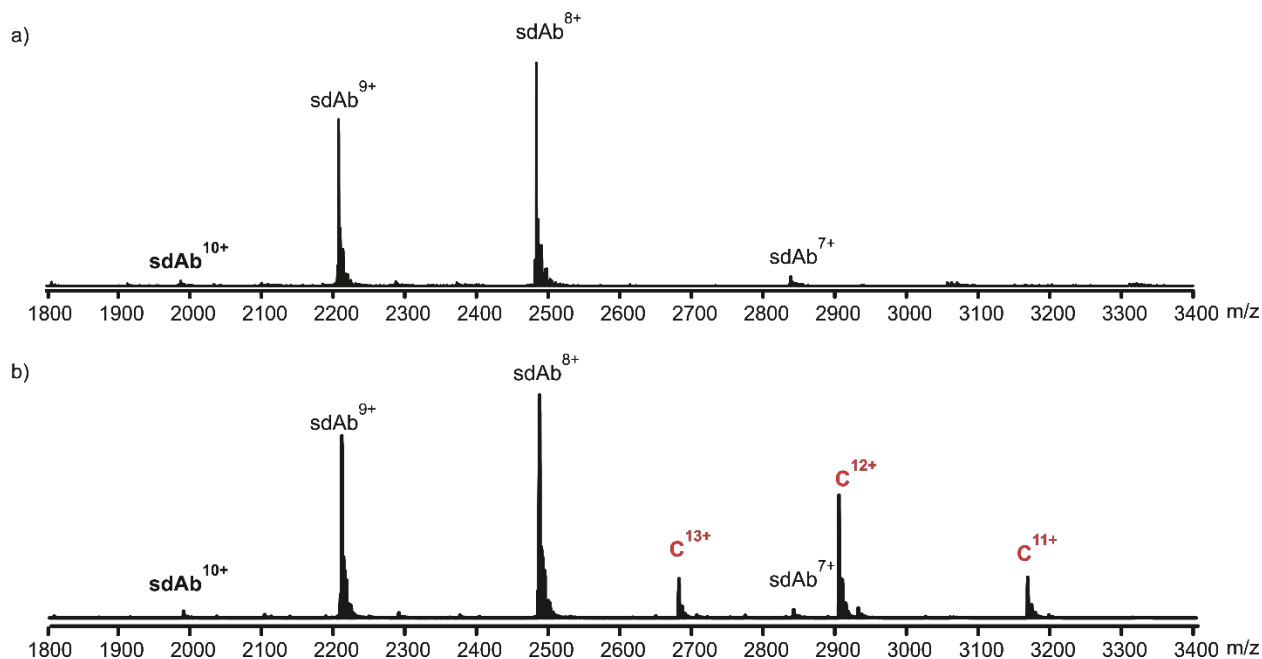

**Figure S6.** Representative ESI mass spectra acquired in positive ion mode for a 200 mM ammonium acetate solution (pH 7.4, 25 °C) of (a) sdAb (3 μM) and (b) sdAb (3 μM) and GAL-7 (4 μM). The (sdAb+GAL-7) complex is denoted at C.

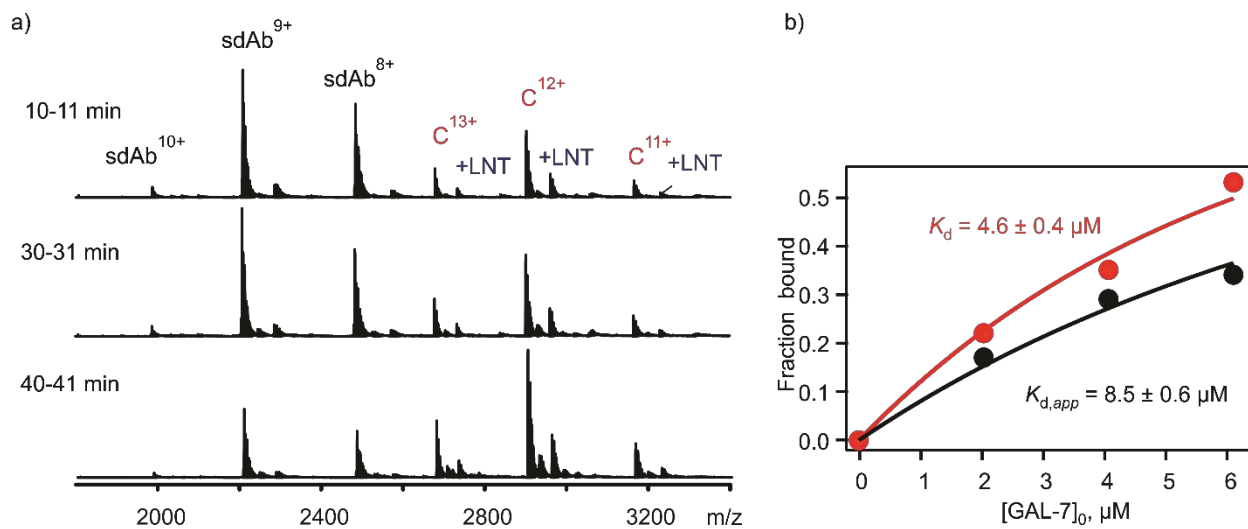

**Figure S7.** (a) Representative time-resolved ESI mass spectra acquired in positive ion mode for a 200 mM ammonium acetate solution (pH 7.4, 25 °C) of GAL-7 (4 μM), sdAb (4 μM) and LNT (50 μM) (*Solution 1*) and GAL-7 (40 μM), sdAb (4 μM) and L (50 μM) (*Solution 2*). (b) Fraction of bound of sdAb plotted as a function of initial GAL-7 concentration ( $[GAL-7]_0$ ) determined without (black circles) and with (red circles) consideration of  $RF_{sdAb/(sdAb+GAL-7)}$ . Solid curves represent best fit of eq 11 to the experimental data.

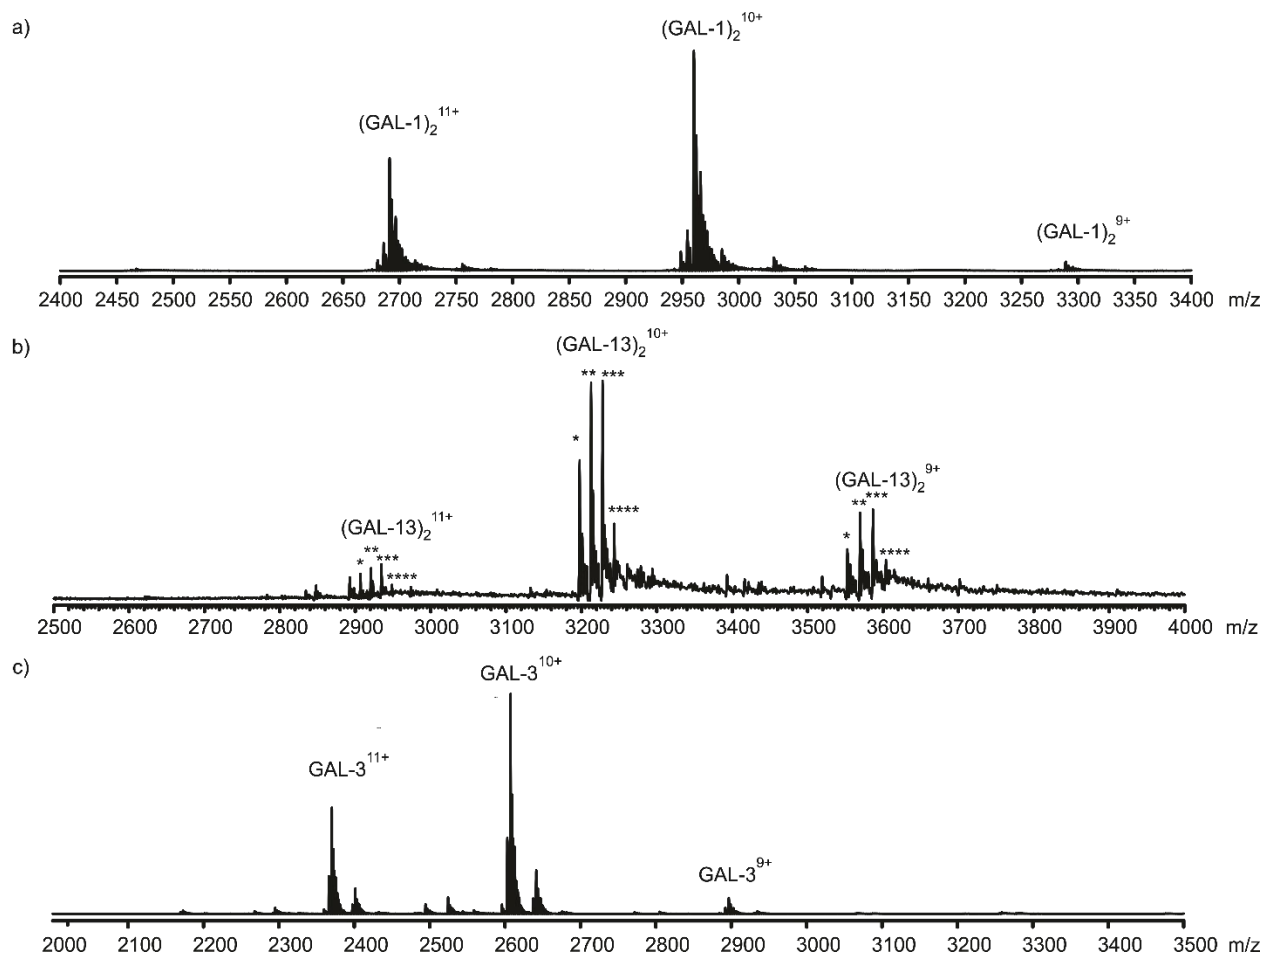

**Figure S8.** Representative ESI mass spectra acquired in positive ion mode for 200 mM ammonium acetate solutions (pH 7.4, 25 °C) of (a) GAL-1 (5 μM), (b) GAL-13 (5 μM) and (c) GAL-3 (3 μM). 4 different peaks were detected for GAL-13 because of terminal methionine (M) lost. \* GAL-13 dimer minus 2 methionine, \*\* GAL-13 dimer minus methionine, \*\*\* GAL-13 dimer, \*\*\*\* unidentified post-translation modification of GAL-13 dimer.



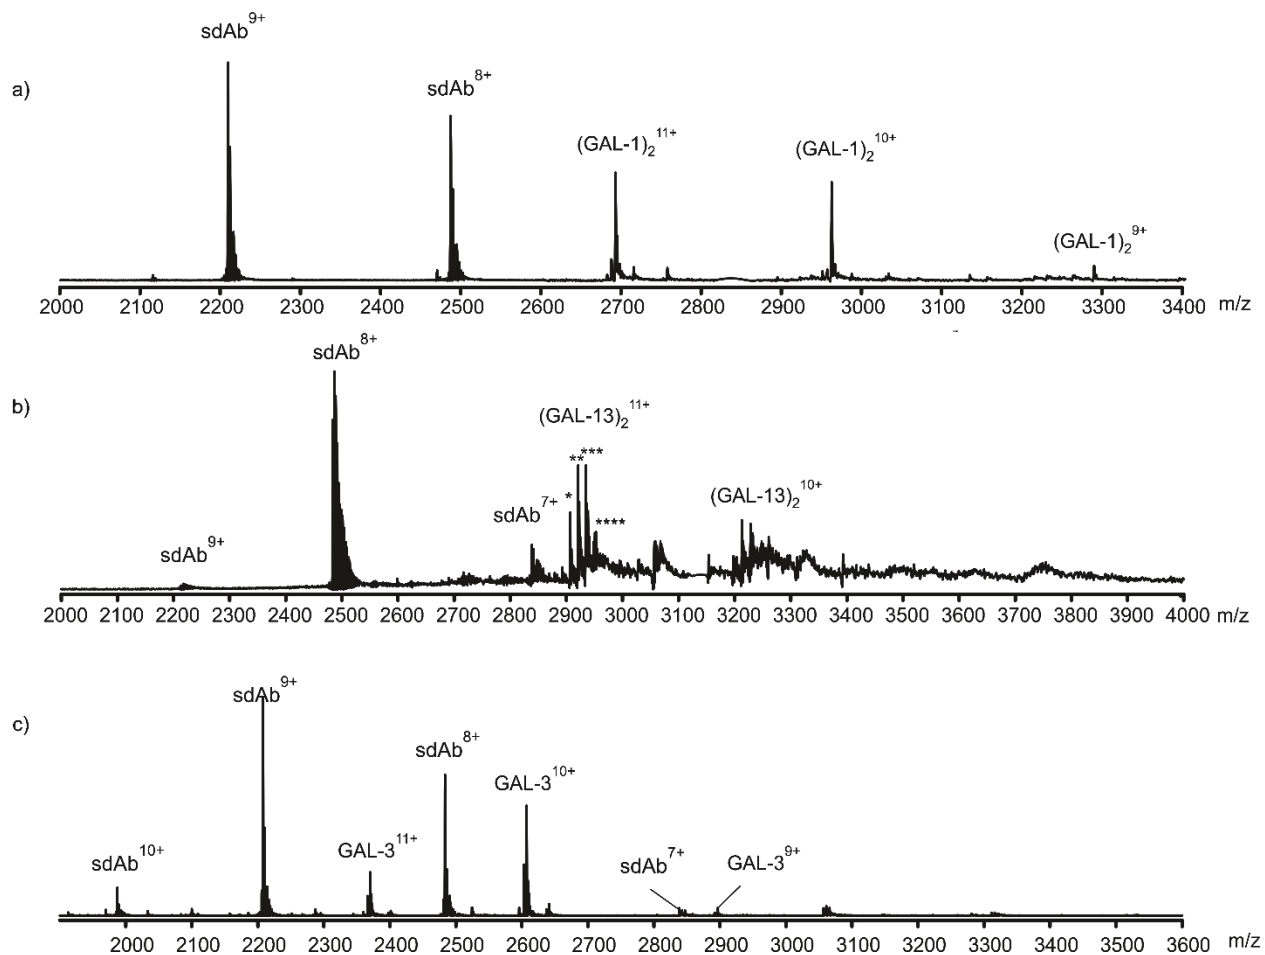

**Figure S9.** Representative ESI mass spectra acquired in positive ion mode for 200 mM ammonium acetate solutions (pH 7.4, 25 °C) of sdAb (3 μM) with (a) GAL-1 (5 μM), (b) GAL-13 (15 μM) and (c) GAL-3 (26 μM). \* GAL-13 dimer minus 2 methionine, \*\* GAL-13 dimer minus methionine, \*\*\* GAL-13 dimer, \*\*\*\* unidentified post-translation modification of GAL-13 dimer.

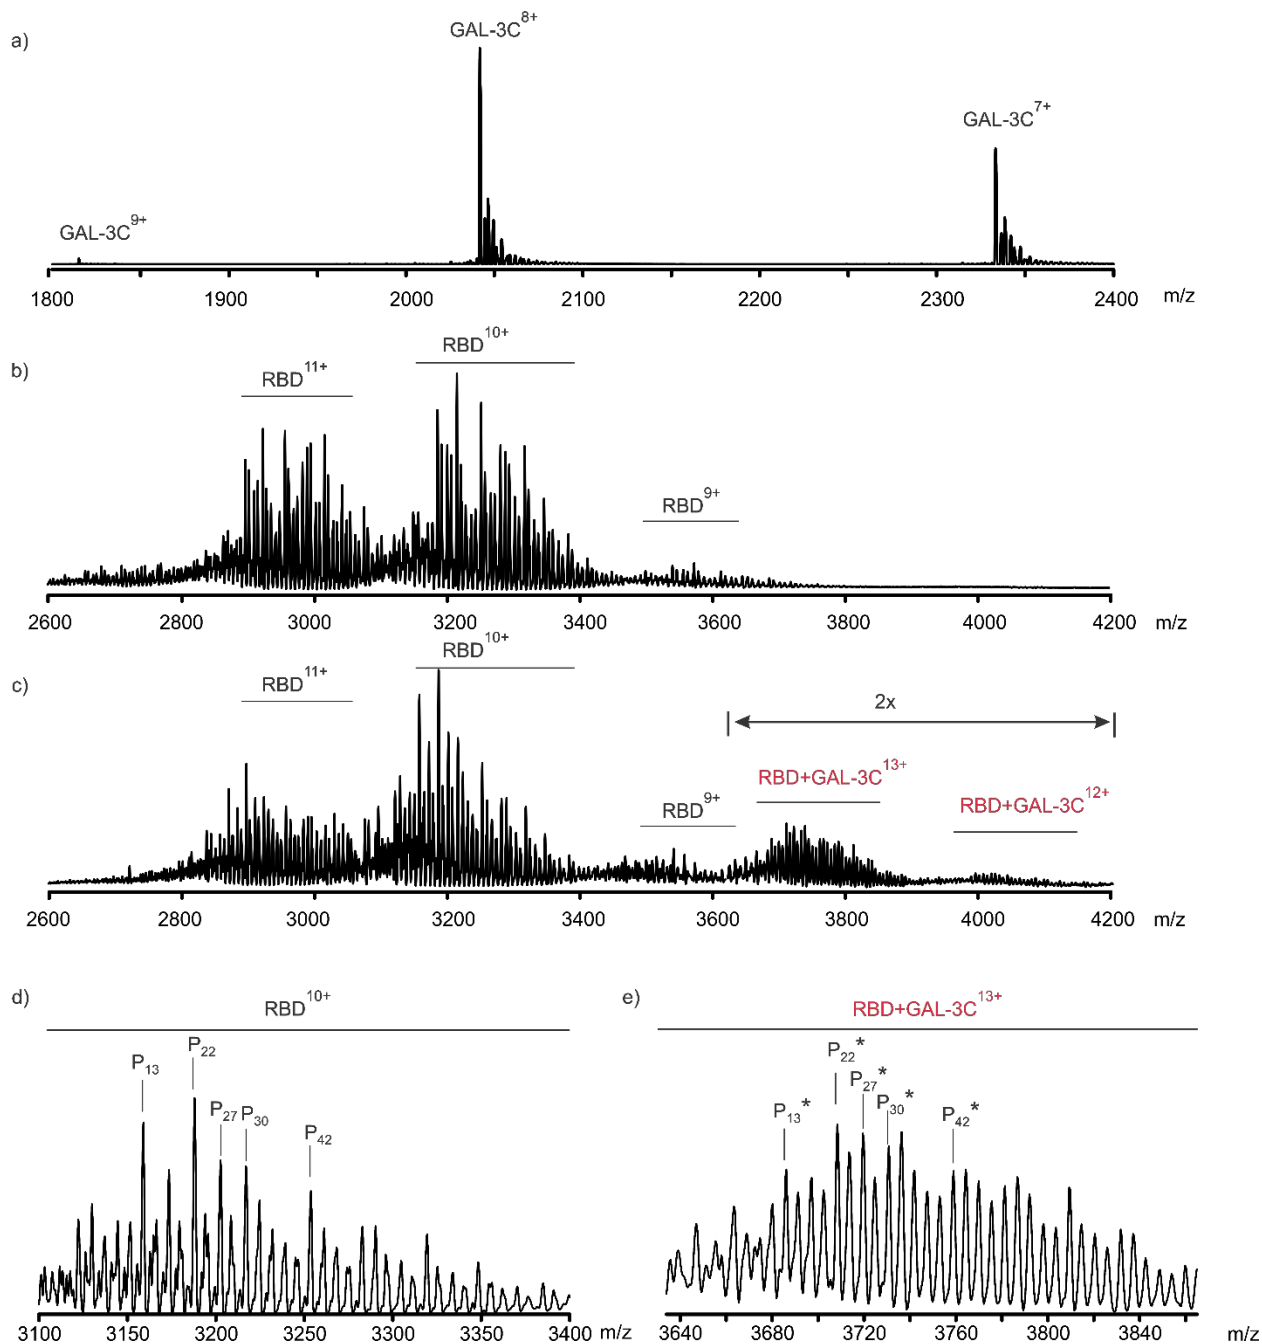

**Figure S10.** Representative ESI mass spectra acquired in positive ion mode for a 200 mM ammonium acetate solution (pH 7.4, 25 °C) of (a) GAL-3C (5 μM), (b) RBD (5 μM) and (c) RBD (5 μM) and GAL-3C (5 μM). Expanded view of the most abundant charge state of (d) free RBD (10+) and (e) the (RBD+GAL-3C) complex (13+). The most abundant RBD glycoforms are denoted for free RBD (P<sub>i</sub>) and the corresponding GAL-3C complex (P<sub>i</sub><sup>\*</sup>).

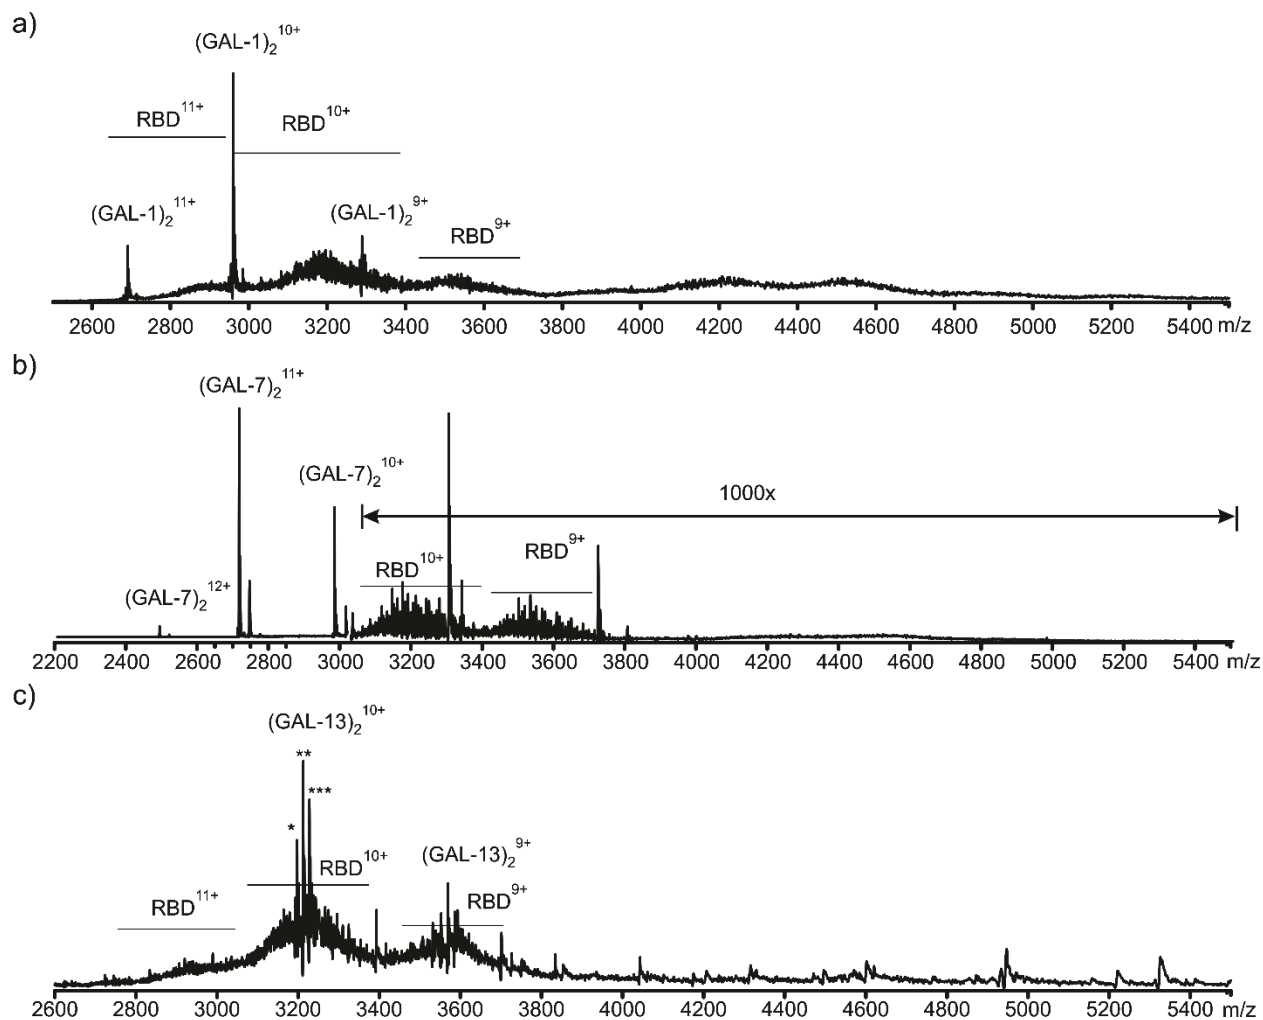

**Figure S11.** Representative ESI mass spectra acquired in positive ion mode for 200 mM ammonium acetate solutions (pH 7.4, 25  $^{\circ}\text{C}$ ) of (a) GAL-1 (3.5  $\mu\text{M}$ ) and RBD (4  $\mu\text{M}$ ), (b) Gal-7 (10  $\mu\text{M}$ ) and RBD (10  $\mu\text{M}$ ) and (c) GAL-13 (3.5  $\mu\text{M}$ ) and RBD (4  $\mu\text{M}$ ). \* GAL-13 dimer minus 2 methionine, \*\* GAL-13 dimer minus methionine, \*\*\* GAL-13 dimer.

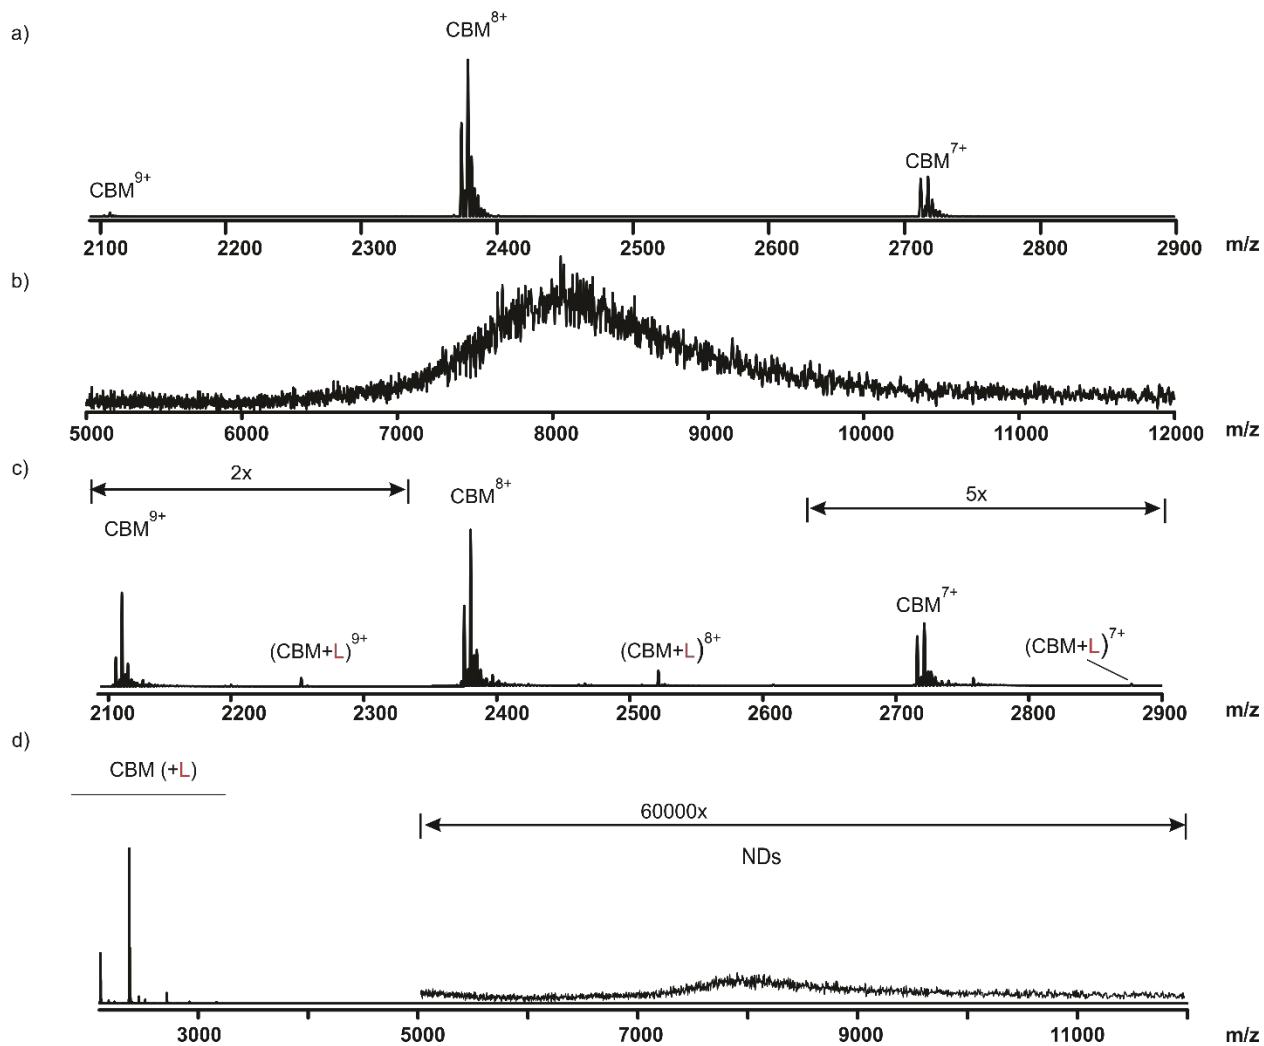

**Figure S12.** Representative ESI mass spectra acquired in positive ion mode for a 200 mM ammonium acetate solution (pH 6.9, 25 °C) of (a) CBM (5 μM), (b) ND (4 μM) containing B-tri<sub>NGL</sub> (L, 120 μM) and (c) CBM (5 μM) and B-tri<sub>NGL</sub>-containing ND (4 μM). (d) Expanded region (m/z 2000-2900) of mass spectrum shown in (c).

## References

- S1 Vladoiu, M. C.; Labrie, M.; Létourneau, M.; Egesborg, P.; Gagné, D.; Billard, É.; Grosset, A.-A.; Doucet, N.; Chatenet, D.; St-Pierre, Y. Design of a Peptidic Inhibitor That Targets the Dimer Interface of a Prototypic Galectin. *Oncotarget* **2015**, *6*, 40970-40980.
- S2 Stowell, S. R.; Arthur, C. M.; Dias-Baruffi, M.; Rodrigues, L. C.; Gourdine, J.-P.; Heimbürg-Molinari, J.; Ju, T.; Molinari, R. J.; Rivera-Marrero, C.; Xia, B.; Smith, D. F.; Cummings, R. D. Innate Immune Lectins Kill Bacteria Expressing Blood Group Antigen. *Nat. Med.* **2010**, *16*, 295–301.
